# Supplementary material for: Community-Based Participatory Research and Drug Utilization Research to Improve Childhood Diarrhea Case Management in Ujjain, India: A Cross-Sectional Survey
Source: MDPI journal article supplement (doi:10.3390/ijerph16091646), 2019-05-11
Supplement: s1 [file s1]

Table S1: Community perception about cause and treatment of diarrhea

| <b>Perception regarding cause of diarrhea</b>     | <b>Number</b> | <b>%</b> |
|---------------------------------------------------|---------------|----------|
| Stale /Spoiled food                               | 830           | 70       |
| Teething                                          | 728           | 62       |
| Hot weather                                       | 648           | 55       |
| Unsafe drinking water                             | 310           | 26       |
| Poor hand hygiene                                 | 273           | 21       |
| Littering around household                        | 173           | 15       |
| Spicy food                                        | 43            | 4        |
| Not vaccinating the child                         | 32            | 3        |
| Overcrowding                                      | 29            | 2        |
| Open defecation                                   | 25            | 2        |
| <b>Perception regarding treatment of diarrhea</b> | <b>Number</b> | <b>%</b> |
| Tablet/Syrups                                     | 751           | 64       |
| Homemade diet                                     | 460           | 39       |
| O.R.S.                                            | 330           | 28       |
| Banana                                            | 158           | 13       |
| Do Not Know                                       | 119           | 10       |
| Solution of salt sugar                            | 91            | 8        |
| More water to drink                               | 69            | 6        |
| Alternative medicines (AYUSH)                     | 53            | 4        |
| No treatment required                             | 51            | 4        |
| I.V. / Saline                                     | 43            | 4        |
| Zinc table/syrup                                  | 22            | 2        |
